# Supplementary material for: ETAS®50 Attenuates Ultraviolet‐B‐Induced Interleukin‐6 Expression by Suppressing Akt Phosphorylation in Normal Human Dermal Fibroblasts
Source: Hindawi journal article supplement (doi:10.1155/2018/1547120), 2018-01-01
Supplement: f1 [file 1547120.f1.pdf]

**ETAS®50 Attenuates Ultraviolet-B-Induced Interleukin-6 Expression by Suppressing Akt Phosphorylation in Normal Human Dermal Fibroblasts**

**Ken Shirato,<sup>1</sup> Tomoko Koda,<sup>2</sup> Jun Takanari,<sup>3</sup> Junetsu Ogasawara,<sup>4</sup> Takuya Sakurai,<sup>1</sup> Hideki Ohno,<sup>5</sup> and Takako Kizaki<sup>1</sup>**

*<sup>1</sup>Department of Molecular Predictive Medicine and Sport Science, Kyorin University School of Medicine, 6-20-2 Shinkawa, Mitaka, Tokyo 181-8611, Japan*

*<sup>2</sup>Faculty of Nursing, Tokyo Healthcare University, 2-5-1 Higashigaoka, Meguro, Tokyo 152-8558, Japan*

*<sup>3</sup>Amino Up Chemical Co. Ltd., 363-32 Shin-ei, Kiyota, Sapporo, Hokkaido 004-0839, Japan*

*<sup>4</sup>Department of Health Science, Asahikawa Medical University, 2-1-1 Midorigaoka-Higashi, Asahikawa, Hokkaido 078-8510, Japan*

*<sup>5</sup>Social Medical Corporation, the Yamatokai Foundation, 1-13-12 Nangai, Higashiyamato, Tokyo 207-0014, Japan*

E-mail addresses: [shirato@ks.kyorin-u.ac.jp](mailto:shirato@ks.kyorin-u.ac.jp) (K. Shirato); [t-kouda@thcu.ac.jp](mailto:t-kouda@thcu.ac.jp) (T. Koda); [takanari@aminoup.co.jp](mailto:takanari@aminoup.co.jp) (J. Takanari); [junetsu@asahikawa-med.ac.jp](mailto:junetsu@asahikawa-med.ac.jp) (J. Ogasawara); [sakutaku@ks.kyorin-u.ac.jp](mailto:sakutaku@ks.kyorin-u.ac.jp) (T. Sakurai); [ohnoh2o@yamatokai.or.jp](mailto:ohnoh2o@yamatokai.or.jp) (H. Ohno); [kizaki@ks.kyorin-u.ac.jp](mailto:kizaki@ks.kyorin-u.ac.jp) (T. Kizaki)

Correspondence should be addressed to Ken Shirato; [shirato@ks.kyorin-u.ac.jp](mailto:shirato@ks.kyorin-u.ac.jp)

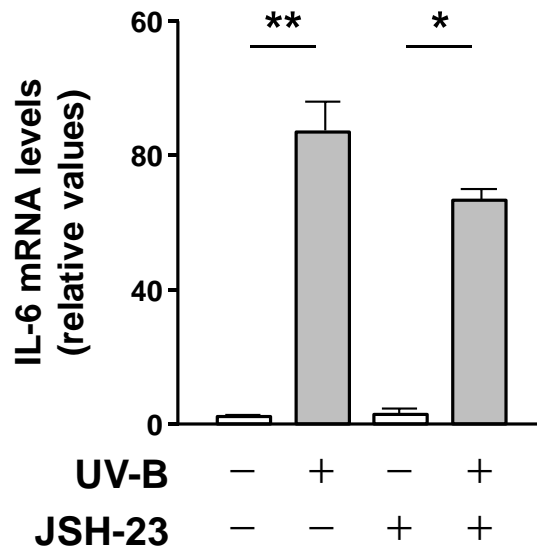

SUPPLEMENTARY FIGURE 1: Effect of an NF- $\kappa$ B inhibitor JSH-23 treatment on UV-B irradiation-induced IL-6 mRNA expression in NHDFs. Cells were treated with 10  $\mu$ M JSH-23 or dimethylsulfoxide vehicle control for 24 h after UV-B irradiation (20 mJ/cm<sup>2</sup>). The mRNA levels of IL-6 were analyzed by real-time PCR. The expression levels of IL-6 mRNA were calculated as the ratio of its value to that of 18S rRNA. Mean  $\pm$  SEM ( $n = 3$ ). \* $p < 0.05$ , \*\* $p < 0.01$  (by one-way ANOVA and the Tukey's test).
